# Supplementary material for: The semantic basis of taste-shape associations
Source: PeerJ. 2016 Feb 4;4:e1644. doi: 10.7717/peerj.1644 (PMC4783761; doi:10.7717/peerj.1644)
Supplement: Supplemental Information 1 [file peerj-04-1644-s001.xlsx]

## Sheet: Data
P	Gender	Age	Scale	Stimulus	Rating
1	male	31	awfulnice	angular1	26.76
1	male	31	awfulnice	angular2	23.24
1	male	31	awfulnice	bitter	39.45
1	male	31	awfulnice	round1	51.56
1	male	31	awfulnice	round2	58.4
1	male	31	awfulnice	salty	61.33
1	male	31	awfulnice	sour	25.78
1	male	31	awfulnice	sweet	87.11
1	male	31	badgood	angular1	36.13
1	male	31	badgood	angular2	26.95
1	male	31	badgood	bitter	58.59
1	male	31	badgood	round1	59.96
1	male	31	badgood	round2	61.91
1	male	31	badgood	salty	66.41
1	male	31	badgood	sour	37.11
1	male	31	badgood	sweet	71.68
1	male	31	deadalive	angular1	73.63
1	male	31	deadalive	angular2	70.9
1	male	31	deadalive	bitter	81.84
1	male	31	deadalive	round1	62.5
1	male	31	deadalive	round2	84.57
1	male	31	deadalive	salty	42.97
1	male	31	deadalive	sour	65.82
1	male	31	deadalive	sweet	80.27
1	male	31	harshmild	angular1	15.23
1	male	31	harshmild	angular2	28.52
1	male	31	harshmild	bitter	13.67
1	male	31	harshmild	round1	65.63
1	male	31	harshmild	round2	55.47
1	male	31	harshmild	salty	10.74
1	male	31	harshmild	sour	12.5
1	male	31	harshmild	sweet	73.83
1	male	31	lightheavy	angular1	32.23
1	male	31	lightheavy	angular2	33.79
1	male	31	lightheavy	bitter	50.98
1	male	31	lightheavy	round1	35.35
1	male	31	lightheavy	round2	31.64
1	male	31	lightheavy	salty	58.2
1	male	31	lightheavy	sour	31.84
1	male	31	lightheavy	sweet	16.99
1	male	31	passiveactive	angular1	95.12
1	male	31	passiveactive	angular2	86.72
1	male	31	passiveactive	bitter	70.9
1	male	31	passiveactive	round1	36.13
1	male	31	passiveactive	round2	64.84
1	male	31	passiveactive	salty	73.44
1	male	31	passiveactive	sour	89.65
1	male	31	passiveactive	sweet	39.65
1	male	31	lesspowerful	angular1	55.27
1	male	31	lesspowerful	angular2	71.29
1	male	31	lesspowerful	bitter	57.62
1	male	31	lesspowerful	round1	31.64
1	male	31	lesspowerful	round2	44.14
1	male	31	lesspowerful	salty	29.1
1	male	31	lesspowerful	sour	66.41
1	male	31	lesspowerful	sweet	16.41
1	male	31	quietnoisy	angular1	93.36
1	male	31	quietnoisy	angular2	85.94
1	male	31	quietnoisy	bitter	62.11
1	male	31	quietnoisy	round1	67.77
1	male	31	quietnoisy	round2	76.37
1	male	31	quietnoisy	salty	43.36
1	male	31	quietnoisy	sour	57.03
1	male	31	quietnoisy	sweet	26.37
1	male	31	sadhappy	angular1	67.38
1	male	31	sadhappy	angular2	92.38
1	male	31	sadhappy	bitter	15.62
1	male	31	sadhappy	round1	59.37
1	male	31	sadhappy	round2	68.36
1	male	31	sadhappy	salty	14.06
1	male	31	sadhappy	sour	37.7
1	male	31	sadhappy	sweet	77.93
1	male	31	shallowdeep	angular1	34.18
1	male	31	shallowdeep	angular2	71.29
1	male	31	shallowdeep	bitter	39.84
1	male	31	shallowdeep	round1	66.6
1	male	31	shallowdeep	round2	35.35
1	male	31	shallowdeep	salty	80.47
1	male	31	shallowdeep	sour	37.89
1	male	31	shallowdeep	sweet	73.63
1	male	31	slowfast	angular1	94.53
1	male	31	slowfast	angular2	76.95
1	male	31	slowfast	bitter	62.3
1	male	31	slowfast	round1	13.48
1	male	31	slowfast	round2	42.38
1	male	31	slowfast	salty	31.25
1	male	31	slowfast	sour	75.78
1	male	31	slowfast	sweet	15.23
1	male	31	weakstrong	angular1	75.59
1	male	31	weakstrong	angular2	76.37
1	male	31	weakstrong	bitter	82.23
1	male	31	weakstrong	round1	25
1	male	31	weakstrong	round2	46.09
1	male	31	weakstrong	salty	78.13
1	male	31	weakstrong	sour	83.01
1	male	31	weakstrong	sweet	32.42
2	male	23	awfulnice	angular1	38.28
2	male	23	awfulnice	angular2	62.7
2	male	23	awfulnice	bitter	24.61
2	male	23	awfulnice	round1	62.5
2	male	23	awfulnice	round2	66.41
2	male	23	awfulnice	salty	51.37
2	male	23	awfulnice	sour	59.77
2	male	23	awfulnice	sweet	97.46
2	male	23	badgood	angular1	58.4
2	male	23	badgood	angular2	53.13
2	male	23	badgood	bitter	21.88
2	male	23	badgood	round1	24.8
2	male	23	badgood	round2	41.8
2	male	23	badgood	salty	47.27
2	male	23	badgood	sour	57.42
2	male	23	badgood	sweet	82.03
2	male	23	deadalive	angular1	94.34
2	male	23	deadalive	angular2	100
2	male	23	deadalive	bitter	55.66
2	male	23	deadalive	round1	12.7
2	male	23	deadalive	round2	58.4
2	male	23	deadalive	salty	45.7
2	male	23	deadalive	sour	73.05
2	male	23	deadalive	sweet	87.89
2	male	23	harshmild	angular1	6.25
2	male	23	harshmild	angular2	28.71
2	male	23	harshmild	bitter	8.2
2	male	23	harshmild	round1	50.78
2	male	23	harshmild	round2	60.55
2	male	23	harshmild	salty	50.59
2	male	23	harshmild	sour	28.13
2	male	23	harshmild	sweet	78.13
2	male	23	lightheavy	angular1	23.24
2	male	23	lightheavy	angular2	25.2
2	male	23	lightheavy	bitter	60.94
2	male	23	lightheavy	round1	53.13
2	male	23	lightheavy	round2	18.55
2	male	23	lightheavy	salty	42.97
2	male	23	lightheavy	sour	39.45
2	male	23	lightheavy	sweet	2.73
2	male	23	passiveactive	angular1	76.56
2	male	23	passiveactive	angular2	84.18
2	male	23	passiveactive	bitter	79.88
2	male	23	passiveactive	round1	22.66
2	male	23	passiveactive	round2	90.82
2	male	23	passiveactive	salty	48.05
2	male	23	passiveactive	sour	91.21
2	male	23	passiveactive	sweet	79.49
2	male	23	lesspowerful	angular1	56.45
2	male	23	lesspowerful	angular2	75.98
2	male	23	lesspowerful	bitter	73.05
2	male	23	lesspowerful	round1	24.41
2	male	23	lesspowerful	round2	37.7
2	male	23	lesspowerful	salty	40.43
2	male	23	lesspowerful	sour	52.15
2	male	23	lesspowerful	sweet	75.2
2	male	23	quietnoisy	angular1	70.31
2	male	23	quietnoisy	angular2	53.32
2	male	23	quietnoisy	bitter	55.66
2	male	23	quietnoisy	round1	4.69
2	male	23	quietnoisy	round2	44.34
2	male	23	quietnoisy	salty	67.19
2	male	23	quietnoisy	sour	40.04
2	male	23	quietnoisy	sweet	74.22
2	male	23	sadhappy	angular1	53.13
2	male	23	sadhappy	angular2	74.02
2	male	23	sadhappy	bitter	35.55
2	male	23	sadhappy	round1	14.65
2	male	23	sadhappy	round2	42.38
2	male	23	sadhappy	salty	46.88
2	male	23	sadhappy	sour	67.19
2	male	23	sadhappy	sweet	86.91
2	male	23	shallowdeep	angular1	72.27
2	male	23	shallowdeep	angular2	55.66
2	male	23	shallowdeep	bitter	41.8
2	male	23	shallowdeep	round1	15.23
2	male	23	shallowdeep	round2	37.11
2	male	23	shallowdeep	salty	40.43
2	male	23	shallowdeep	sour	95.51
2	male	23	shallowdeep	sweet	92.58
2	male	23	slowfast	angular1	95.51
2	male	23	slowfast	angular2	65.23
2	male	23	slowfast	bitter	54.3
2	male	23	slowfast	round1	34.77
2	male	23	slowfast	round2	27.34
2	male	23	slowfast	salty	36.13
2	male	23	slowfast	sour	59.57
2	male	23	slowfast	sweet	82.03
2	male	23	weakstrong	angular1	52.34
2	male	23	weakstrong	angular2	73.63
2	male	23	weakstrong	bitter	75.59
2	male	23	weakstrong	round1	9.38
2	male	23	weakstrong	round2	34.77
2	male	23	weakstrong	salty	52.15
2	male	23	weakstrong	sour	58.2
2	male	23	weakstrong	sweet	65.23
3	male	36	awfulnice	angular1	22.85
3	male	36	awfulnice	angular2	44.53
3	male	36	awfulnice	bitter	0
3	male	36	awfulnice	round1	41.21
3	male	36	awfulnice	round2	66.21
3	male	36	awfulnice	salty	78.12
3	male	36	awfulnice	sour	15.82
3	male	36	awfulnice	sweet	73.05
3	male	36	badgood	angular1	35.55
3	male	36	badgood	angular2	50.78
3	male	36	badgood	bitter	4.88
3	male	36	badgood	round1	53.52
3	male	36	badgood	round2	58.01
3	male	36	badgood	salty	75.59
3	male	36	badgood	sour	30.47
3	male	36	badgood	sweet	67.38
3	male	36	deadalive	angular1	41.6
3	male	36	deadalive	angular2	91.41
3	male	36	deadalive	bitter	0
3	male	36	deadalive	round1	47.27
3	male	36	deadalive	round2	71.29
3	male	36	deadalive	salty	71.88
3	male	36	deadalive	sour	23.24
3	male	36	deadalive	sweet	88.87
3	male	36	harshmild	angular1	3.13
3	male	36	harshmild	angular2	8.98
3	male	36	harshmild	bitter	0
3	male	36	harshmild	round1	34.18
3	male	36	harshmild	round2	40.23
3	male	36	harshmild	salty	77.93
3	male	36	harshmild	sour	17.97
3	male	36	harshmild	sweet	75.2
3	male	36	lightheavy	angular1	66.99
3	male	36	lightheavy	angular2	66.99
3	male	36	lightheavy	bitter	85.74
3	male	36	lightheavy	round1	31.25
3	male	36	lightheavy	round2	67.38
3	male	36	lightheavy	salty	30.08
3	male	36	lightheavy	sour	71.68
3	male	36	lightheavy	sweet	30.86
3	male	36	passiveactive	angular1	83.2
3	male	36	passiveactive	angular2	81.64
3	male	36	passiveactive	bitter	83.98
3	male	36	passiveactive	round1	20.51
3	male	36	passiveactive	round2	59.57
3	male	36	passiveactive	salty	37.11
3	male	36	passiveactive	sour	63.28
3	male	36	passiveactive	sweet	14.84
3	male	36	lesspowerful	angular1	73.83
3	male	36	lesspowerful	angular2	85.74
3	male	36	lesspowerful	bitter	100
3	male	36	lesspowerful	round1	17.97
3	male	36	lesspowerful	round2	66.21
3	male	36	lesspowerful	salty	32.03
3	male	36	lesspowerful	sour	76.76
3	male	36	lesspowerful	sweet	10.74
3	male	36	quietnoisy	angular1	85.16
3	male	36	quietnoisy	angular2	97.27
3	male	36	quietnoisy	bitter	99.8
3	male	36	quietnoisy	round1	17.19
3	male	36	quietnoisy	round2	66.02
3	male	36	quietnoisy	salty	35.74
3	male	36	quietnoisy	sour	65.82
3	male	36	quietnoisy	sweet	26.17
3	male	36	sadhappy	angular1	25
3	male	36	sadhappy	angular2	64.45
3	male	36	sadhappy	bitter	1.76
3	male	36	sadhappy	round1	36.33
3	male	36	sadhappy	round2	67.19
3	male	36	sadhappy	salty	79.69
3	male	36	sadhappy	sour	25.78
3	male	36	sadhappy	sweet	96.29
3	male	36	shallowdeep	angular1	74.02
3	male	36	shallowdeep	angular2	80.27
3	male	36	shallowdeep	bitter	100
3	male	36	shallowdeep	round1	7.42
3	male	36	shallowdeep	round2	28.12
3	male	36	shallowdeep	salty	81.64
3	male	36	shallowdeep	sour	71.09
3	male	36	shallowdeep	sweet	88.48
3	male	36	slowfast	angular1	66.6
3	male	36	slowfast	angular2	87.5
3	male	36	slowfast	bitter	84.57
3	male	36	slowfast	round1	25.2
3	male	36	slowfast	round2	63.67
3	male	36	slowfast	salty	20.12
3	male	36	slowfast	sour	62.3
3	male	36	slowfast	sweet	17.58
3	male	36	weakstrong	angular1	84.18
3	male	36	weakstrong	angular2	68.36
3	male	36	weakstrong	bitter	100
3	male	36	weakstrong	round1	32.03
3	male	36	weakstrong	round2	73.63
3	male	36	weakstrong	salty	22.46
3	male	36	weakstrong	sour	72.66
3	male	36	weakstrong	sweet	12.89
4	female	36	awfulnice	angular1	34.77
4	female	36	awfulnice	angular2	39.06
4	female	36	awfulnice	bitter	32.62
4	female	36	awfulnice	round1	28.52
4	female	36	awfulnice	round2	74.22
4	female	36	awfulnice	salty	80.66
4	female	36	awfulnice	sour	30.27
4	female	36	awfulnice	sweet	99.8
4	female	36	badgood	angular1	0.78
4	female	36	badgood	angular2	0.59
4	female	36	badgood	bitter	14.65
4	female	36	badgood	round1	51.17
4	female	36	badgood	round2	15.43
4	female	36	badgood	salty	83.01
4	female	36	badgood	sour	22.85
4	female	36	badgood	sweet	85.16
4	female	36	deadalive	angular1	100
4	female	36	deadalive	angular2	99.61
4	female	36	deadalive	bitter	99.61
4	female	36	deadalive	round1	6.45
4	female	36	deadalive	round2	87.89
4	female	36	deadalive	salty	32.42
4	female	36	deadalive	sour	99.8
4	female	36	deadalive	sweet	29.88
4	female	36	harshmild	angular1	0.39
4	female	36	harshmild	angular2	13.09
4	female	36	harshmild	bitter	0.78
4	female	36	harshmild	round1	63.87
4	female	36	harshmild	round2	15.43
4	female	36	harshmild	salty	26.76
4	female	36	harshmild	sour	0.39
4	female	36	harshmild	sweet	38.67
4	female	36	lightheavy	angular1	100
4	female	36	lightheavy	angular2	99.41
4	female	36	lightheavy	bitter	99.61
4	female	36	lightheavy	round1	0.78
4	female	36	lightheavy	round2	80.86
4	female	36	lightheavy	salty	34.18
4	female	36	lightheavy	sour	99.22
4	female	36	lightheavy	sweet	32.42
4	female	36	passiveactive	angular1	99.8
4	female	36	passiveactive	angular2	88.67
4	female	36	passiveactive	bitter	100
4	female	36	passiveactive	round1	0.59
4	female	36	passiveactive	round2	99.8
4	female	36	passiveactive	salty	75.59
4	female	36	passiveactive	sour	99.61
4	female	36	passiveactive	sweet	36.72
4	female	36	lesspowerful	angular1	99.02
4	female	36	lesspowerful	angular2	100
4	female	36	lesspowerful	bitter	99.02
4	female	36	lesspowerful	round1	9.18
4	female	36	lesspowerful	round2	89.84
4	female	36	lesspowerful	salty	30.08
4	female	36	lesspowerful	sour	99.41
4	female	36	lesspowerful	sweet	31.64
4	female	36	quietnoisy	angular1	99.61
4	female	36	quietnoisy	angular2	99.61
4	female	36	quietnoisy	bitter	99.61
4	female	36	quietnoisy	round1	7.81
4	female	36	quietnoisy	round2	92.58
4	female	36	quietnoisy	salty	39.65
4	female	36	quietnoisy	sour	99.41
4	female	36	quietnoisy	sweet	36.91
4	female	36	sadhappy	angular1	8.59
4	female	36	sadhappy	angular2	21.88
4	female	36	sadhappy	bitter	13.87
4	female	36	sadhappy	round1	20.7
4	female	36	sadhappy	round2	75
4	female	36	sadhappy	salty	66.6
4	female	36	sadhappy	sour	12.5
4	female	36	sadhappy	sweet	99.41
4	female	36	shallowdeep	angular1	99.22
4	female	36	shallowdeep	angular2	99.41
4	female	36	shallowdeep	bitter	99.22
4	female	36	shallowdeep	round1	0.59
4	female	36	shallowdeep	round2	89.26
4	female	36	shallowdeep	salty	36.13
4	female	36	shallowdeep	sour	99.22
4	female	36	shallowdeep	sweet	22.27
4	female	36	slowfast	angular1	99.8
4	female	36	slowfast	angular2	99.61
4	female	36	slowfast	bitter	99.22
4	female	36	slowfast	round1	0.98
4	female	36	slowfast	round2	88.87
4	female	36	slowfast	salty	31.84
4	female	36	slowfast	sour	99.8
4	female	36	slowfast	sweet	25.98
4	female	36	weakstrong	angular1	100
4	female	36	weakstrong	angular2	83.2
4	female	36	weakstrong	bitter	100
4	female	36	weakstrong	round1	75.39
4	female	36	weakstrong	round2	77.15
4	female	36	weakstrong	salty	43.95
4	female	36	weakstrong	sour	100
4	female	36	weakstrong	sweet	58.2
5	male	43	awfulnice	angular1	50.78
5	male	43	awfulnice	angular2	89.26
5	male	43	awfulnice	bitter	52.93
5	male	43	awfulnice	round1	22.07
5	male	43	awfulnice	round2	36.13
5	male	43	awfulnice	salty	81.05
5	male	43	awfulnice	sour	54.49
5	male	43	awfulnice	sweet	87.11
5	male	43	badgood	angular1	73.83
5	male	43	badgood	angular2	92.19
5	male	43	badgood	bitter	68.16
5	male	43	badgood	round1	41.6
5	male	43	badgood	round2	35.74
5	male	43	badgood	salty	87.5
5	male	43	badgood	sour	55.66
5	male	43	badgood	sweet	87.11
5	male	43	deadalive	angular1	65.04
5	male	43	deadalive	angular2	93.36
5	male	43	deadalive	bitter	90.43
5	male	43	deadalive	round1	31.84
5	male	43	deadalive	round2	27.54
5	male	43	deadalive	salty	87.89
5	male	43	deadalive	sour	55.66
5	male	43	deadalive	sweet	82.42
5	male	43	harshmild	angular1	21.29
5	male	43	harshmild	angular2	30.86
5	male	43	harshmild	bitter	43.36
5	male	43	harshmild	round1	89.65
5	male	43	harshmild	round2	90.63
5	male	43	harshmild	salty	66.6
5	male	43	harshmild	sour	60.55
5	male	43	harshmild	sweet	71.09
5	male	43	lightheavy	angular1	59.38
5	male	43	lightheavy	angular2	78.91
5	male	43	lightheavy	bitter	94.14
5	male	43	lightheavy	round1	71.68
5	male	43	lightheavy	round2	33.59
5	male	43	lightheavy	salty	72.85
5	male	43	lightheavy	sour	28.91
5	male	43	lightheavy	sweet	72.46
5	male	43	passiveactive	angular1	82.23
5	male	43	passiveactive	angular2	87.3
5	male	43	passiveactive	bitter	98.05
5	male	43	passiveactive	round1	27.93
5	male	43	passiveactive	round2	34.37
5	male	43	passiveactive	salty	59.37
5	male	43	passiveactive	sour	77.54
5	male	43	passiveactive	sweet	86.52
5	male	43	lesspowerful	angular1	72.46
5	male	43	lesspowerful	angular2	95.51
5	male	43	lesspowerful	bitter	67.97
5	male	43	lesspowerful	round1	19.92
5	male	43	lesspowerful	round2	20.9
5	male	43	lesspowerful	salty	64.06
5	male	43	lesspowerful	sour	51.76
5	male	43	lesspowerful	sweet	70.9
5	male	43	quietnoisy	angular1	67.19
5	male	43	quietnoisy	angular2	92.58
5	male	43	quietnoisy	bitter	53.52
5	male	43	quietnoisy	round1	10.74
5	male	43	quietnoisy	round2	13.28
5	male	43	quietnoisy	salty	71.68
5	male	43	quietnoisy	sour	71.68
5	male	43	quietnoisy	sweet	69.92
5	male	43	sadhappy	angular1	80.08
5	male	43	sadhappy	angular2	93.16
5	male	43	sadhappy	bitter	40.23
5	male	43	sadhappy	round1	5.66
5	male	43	sadhappy	round2	11.52
5	male	43	sadhappy	salty	76.56
5	male	43	sadhappy	sour	39.26
5	male	43	sadhappy	sweet	85.16
5	male	43	shallowdeep	angular1	25.98
5	male	43	shallowdeep	angular2	68.75
5	male	43	shallowdeep	bitter	45.51
5	male	43	shallowdeep	round1	50
5	male	43	shallowdeep	round2	37.89
5	male	43	shallowdeep	salty	79.49
5	male	43	shallowdeep	sour	87.89
5	male	43	shallowdeep	sweet	72.27
5	male	43	slowfast	angular1	52.73
5	male	43	slowfast	angular2	96.09
5	male	43	slowfast	bitter	79.69
5	male	43	slowfast	round1	12.89
5	male	43	slowfast	round2	33.59
5	male	43	slowfast	salty	66.02
5	male	43	slowfast	sour	57.42
5	male	43	slowfast	sweet	71.29
5	male	43	weakstrong	angular1	18.16
5	male	43	weakstrong	angular2	76.95
5	male	43	weakstrong	bitter	67.97
5	male	43	weakstrong	round1	24.22
5	male	43	weakstrong	round2	30.08
5	male	43	weakstrong	salty	80.08
5	male	43	weakstrong	sour	55.66
5	male	43	weakstrong	sweet	50.39
6	female	34	awfulnice	angular1	27.34
6	female	34	awfulnice	angular2	74.8
6	female	34	awfulnice	bitter	32.62
6	female	34	awfulnice	round1	58.2
6	female	34	awfulnice	round2	35.16
6	female	34	awfulnice	salty	29.88
6	female	34	awfulnice	sour	64.26
6	female	34	awfulnice	sweet	52.34
6	female	34	badgood	angular1	42.19
6	female	34	badgood	angular2	37.11
6	female	34	badgood	bitter	71.29
6	female	34	badgood	round1	63.87
6	female	34	badgood	round2	73.44
6	female	34	badgood	salty	63.09
6	female	34	badgood	sour	56.25
6	female	34	badgood	sweet	33.79
6	female	34	deadalive	angular1	65.43
6	female	34	deadalive	angular2	72.07
6	female	34	deadalive	bitter	67.19
6	female	34	deadalive	round1	50.39
6	female	34	deadalive	round2	68.36
6	female	34	deadalive	salty	28.52
6	female	34	deadalive	sour	23.44
6	female	34	deadalive	sweet	89.26
6	female	34	harshmild	angular1	32.03
6	female	34	harshmild	angular2	27.73
6	female	34	harshmild	bitter	32.23
6	female	34	harshmild	round1	53.32
6	female	34	harshmild	round2	27.73
6	female	34	harshmild	salty	29.69
6	female	34	harshmild	sour	34.57
6	female	34	harshmild	sweet	63.28
6	female	34	lightheavy	angular1	38.28
6	female	34	lightheavy	angular2	72.07
6	female	34	lightheavy	bitter	63.28
6	female	34	lightheavy	round1	70.12
6	female	34	lightheavy	round2	44.73
6	female	34	lightheavy	salty	52.93
6	female	34	lightheavy	sour	38.67
6	female	34	lightheavy	sweet	69.14
6	female	34	passiveactive	angular1	77.54
6	female	34	passiveactive	angular2	75
6	female	34	passiveactive	bitter	38.28
6	female	34	passiveactive	round1	69.92
6	female	34	passiveactive	round2	35.35
6	female	34	passiveactive	salty	64.65
6	female	34	passiveactive	sour	18.75
6	female	34	passiveactive	sweet	64.65
6	female	34	lesspowerful	angular1	59.18
6	female	34	lesspowerful	angular2	87.3
6	female	34	lesspowerful	bitter	54.88
6	female	34	lesspowerful	round1	24.8
6	female	34	lesspowerful	round2	72.07
6	female	34	lesspowerful	salty	60.35
6	female	34	lesspowerful	sour	29.49
6	female	34	lesspowerful	sweet	71.68
6	female	34	quietnoisy	angular1	34.37
6	female	34	quietnoisy	angular2	45.51
6	female	34	quietnoisy	bitter	28.32
6	female	34	quietnoisy	round1	39.26
6	female	34	quietnoisy	round2	31.84
6	female	34	quietnoisy	salty	38.48
6	female	34	quietnoisy	sour	70.9
6	female	34	quietnoisy	sweet	51.56
6	female	34	sadhappy	angular1	61.91
6	female	34	sadhappy	angular2	66.21
6	female	34	sadhappy	bitter	37.89
6	female	34	sadhappy	round1	66.02
6	female	34	sadhappy	round2	29.3
6	female	34	sadhappy	salty	32.42
6	female	34	sadhappy	sour	44.53
6	female	34	sadhappy	sweet	36.52
6	female	34	shallowdeep	angular1	32.23
6	female	34	shallowdeep	angular2	62.11
6	female	34	shallowdeep	bitter	42.97
6	female	34	shallowdeep	round1	61.13
6	female	34	shallowdeep	round2	65.23
6	female	34	shallowdeep	salty	60.74
6	female	34	shallowdeep	sour	31.64
6	female	34	shallowdeep	sweet	25
6	female	34	slowfast	angular1	64.06
6	female	34	slowfast	angular2	71.48
6	female	34	slowfast	bitter	68.55
6	female	34	slowfast	round1	62.89
6	female	34	slowfast	round2	56.64
6	female	34	slowfast	salty	28.52
6	female	34	slowfast	sour	41.02
6	female	34	slowfast	sweet	37.11
6	female	34	weakstrong	angular1	67.38
6	female	34	weakstrong	angular2	66.41
6	female	34	weakstrong	bitter	22.85
6	female	34	weakstrong	round1	72.66
6	female	34	weakstrong	round2	27.93
6	female	34	weakstrong	salty	50.98
6	female	34	weakstrong	sour	74.02
6	female	34	weakstrong	sweet	62.3
7	male	39	awfulnice	angular1	32.32
7	male	39	awfulnice	angular2	56.37
7	male	39	awfulnice	bitter	29.01
7	male	39	awfulnice	round1	52.63
7	male	39	awfulnice	round2	78.54
7	male	39	awfulnice	salty	64.53
7	male	39	awfulnice	sour	34.42
7	male	39	awfulnice	sweet	68.73
7	male	39	badgood	angular1	31.16
7	male	39	badgood	angular2	72.23
7	male	39	badgood	bitter	34.66
7	male	39	badgood	round1	49.13
7	male	39	badgood	round2	48.9
7	male	39	badgood	salty	65.94
7	male	39	badgood	sour	26.26
7	male	39	badgood	sweet	93.94
7	male	39	deadalive	angular1	90.21
7	male	39	deadalive	angular2	78.3
7	male	39	deadalive	bitter	63.37
7	male	39	deadalive	round1	24.86
7	male	39	deadalive	round2	50.53
7	male	39	deadalive	salty	75.03
7	male	39	deadalive	sour	40.73
7	male	39	deadalive	sweet	62.9
7	male	39	harshmild	angular1	15.06
7	male	39	harshmild	angular2	4.79
7	male	39	harshmild	bitter	26.49
7	male	39	harshmild	round1	67.1
7	male	39	harshmild	round2	36.06
7	male	39	harshmild	salty	41.89
7	male	39	harshmild	sour	18.55
7	male	39	harshmild	sweet	61.49
7	male	39	lightheavy	angular1	76.07
7	male	39	lightheavy	angular2	83.54
7	male	39	lightheavy	bitter	83.08
7	male	39	lightheavy	round1	62.31
7	male	39	lightheavy	round2	78.41
7	male	39	lightheavy	salty	51.57
7	male	39	lightheavy	sour	65.34
7	male	39	lightheavy	sweet	53.44
7	male	39	passiveactive	angular1	90.21
7	male	39	passiveactive	angular2	68.26
7	male	39	passiveactive	bitter	76.2
7	male	39	passiveactive	round1	33.73
7	male	39	passiveactive	round2	56.6
7	male	39	passiveactive	salty	72.24
7	male	39	passiveactive	sour	48.43
7	male	39	passiveactive	sweet	53.1
7	male	39	lesspowerful	angular1	82.27
7	male	39	lesspowerful	angular2	86.72
7	male	39	lesspowerful	bitter	51.92
7	male	39	lesspowerful	round1	19.03
7	male	39	lesspowerful	round2	39.33
7	male	39	lesspowerful	salty	72.71
7	male	39	lesspowerful	sour	25.79
7	male	39	lesspowerful	sweet	69.67
7	male	39	quietnoisy	angular1	94.17
7	male	39	quietnoisy	angular2	91.13
7	male	39	quietnoisy	bitter	61.04
7	male	39	quietnoisy	round1	34.66
7	male	39	quietnoisy	round2	34.2
7	male	39	quietnoisy	salty	70.6
7	male	39	quietnoisy	sour	18.33
7	male	39	quietnoisy	sweet	62.66
7	male	39	sadhappy	angular1	44.93
7	male	39	sadhappy	angular2	87.64
7	male	39	sadhappy	bitter	14.82
7	male	39	sadhappy	round1	22.75
7	male	39	sadhappy	round2	66.4
7	male	39	sadhappy	salty	69.9
7	male	39	sadhappy	sour	17.16
7	male	39	sadhappy	sweet	85.07
7	male	39	shallowdeep	angular1	27.06
7	male	39	shallowdeep	angular2	77.71
7	male	39	shallowdeep	bitter	40.84
7	male	39	shallowdeep	round1	66.04
7	male	39	shallowdeep	round2	62.3
7	male	39	shallowdeep	salty	72.34
7	male	39	shallowdeep	sour	28.45
7	male	39	shallowdeep	sweet	89.87
7	male	39	slowfast	angular1	95.91
7	male	39	slowfast	angular2	84.47
7	male	39	slowfast	bitter	23.09
7	male	39	slowfast	round1	29.62
7	male	39	slowfast	round2	51.57
7	male	39	slowfast	salty	85.18
7	male	39	slowfast	sour	30.8
7	male	39	slowfast	sweet	66.26
7	male	39	weakstrong	angular1	87.99
7	male	39	weakstrong	angular2	94.98
7	male	39	weakstrong	bitter	67.44
7	male	39	weakstrong	round1	34.31
7	male	39	weakstrong	round2	56.02
7	male	39	weakstrong	salty	70.23
7	male	39	weakstrong	sour	78.64
7	male	39	weakstrong	sweet	45.04
8	male	21	awfulnice	angular1	69.53
8	male	21	awfulnice	angular2	70.7
8	male	21	awfulnice	bitter	59.77
8	male	21	awfulnice	round1	44.53
8	male	21	awfulnice	round2	64.06
8	male	21	awfulnice	salty	49.41
8	male	21	awfulnice	sour	70.7
8	male	21	awfulnice	sweet	59.77
8	male	21	badgood	angular1	32.62
8	male	21	badgood	angular2	36.91
8	male	21	badgood	bitter	25.59
8	male	21	badgood	round1	34.18
8	male	21	badgood	round2	53.12
8	male	21	badgood	salty	27.15
8	male	21	badgood	sour	44.73
8	male	21	badgood	sweet	60.16
8	male	21	deadalive	angular1	60.55
8	male	21	deadalive	angular2	52.73
8	male	21	deadalive	bitter	28.52
8	male	21	deadalive	round1	63.67
8	male	21	deadalive	round2	59.96
8	male	21	deadalive	salty	67.58
8	male	21	deadalive	sour	66.41
8	male	21	deadalive	sweet	48.05
8	male	21	harshmild	angular1	62.5
8	male	21	harshmild	angular2	53.12
8	male	21	harshmild	bitter	62.3
8	male	21	harshmild	round1	56.64
8	male	21	harshmild	round2	46.48
8	male	21	harshmild	salty	46.48
8	male	21	harshmild	sour	37.89
8	male	21	harshmild	sweet	45.7
8	male	21	lightheavy	angular1	53.52
8	male	21	lightheavy	angular2	75.78
8	male	21	lightheavy	bitter	59.96
8	male	21	lightheavy	round1	89.06
8	male	21	lightheavy	round2	75.98
8	male	21	lightheavy	salty	50.98
8	male	21	lightheavy	sour	55.27
8	male	21	lightheavy	sweet	50.98
8	male	21	passiveactive	angular1	45.51
8	male	21	passiveactive	angular2	66.99
8	male	21	passiveactive	bitter	55.08
8	male	21	passiveactive	round1	44.92
8	male	21	passiveactive	round2	48.63
8	male	21	passiveactive	salty	75.39
8	male	21	passiveactive	sour	34.96
8	male	21	passiveactive	sweet	51.95
8	male	21	lesspowerful	angular1	77.73
8	male	21	lesspowerful	angular2	45.51
8	male	21	lesspowerful	bitter	69.34
8	male	21	lesspowerful	round1	55.27
8	male	21	lesspowerful	round2	55.66
8	male	21	lesspowerful	salty	45.31
8	male	21	lesspowerful	sour	77.54
8	male	21	lesspowerful	sweet	50.39
8	male	21	quietnoisy	angular1	71.29
8	male	21	quietnoisy	angular2	52.54
8	male	21	quietnoisy	bitter	58.98
8	male	21	quietnoisy	round1	44.14
8	male	21	quietnoisy	round2	75.98
8	male	21	quietnoisy	salty	47.07
8	male	21	quietnoisy	sour	54.88
8	male	21	quietnoisy	sweet	54.69
8	male	21	sadhappy	angular1	42.58
8	male	21	sadhappy	angular2	56.05
8	male	21	sadhappy	bitter	31.84
8	male	21	sadhappy	round1	60.94
8	male	21	sadhappy	round2	62.11
8	male	21	sadhappy	salty	41.02
8	male	21	sadhappy	sour	33.98
8	male	21	sadhappy	sweet	51.37
8	male	21	shallowdeep	angular1	74.02
8	male	21	shallowdeep	angular2	36.72
8	male	21	shallowdeep	bitter	49.41
8	male	21	shallowdeep	round1	31.45
8	male	21	shallowdeep	round2	33.79
8	male	21	shallowdeep	salty	48.05
8	male	21	shallowdeep	sour	46.48
8	male	21	shallowdeep	sweet	50.78
8	male	21	slowfast	angular1	43.16
8	male	21	slowfast	angular2	49.8
8	male	21	slowfast	bitter	75.2
8	male	21	slowfast	round1	58.4
8	male	21	slowfast	round2	17.58
8	male	21	slowfast	salty	40.82
8	male	21	slowfast	sour	55.08
8	male	21	slowfast	sweet	56.45
8	male	21	weakstrong	angular1	59.57
8	male	21	weakstrong	angular2	55.08
8	male	21	weakstrong	bitter	40.43
8	male	21	weakstrong	round1	43.36
8	male	21	weakstrong	round2	42.97
8	male	21	weakstrong	salty	59.18
8	male	21	weakstrong	sour	37.7
8	male	21	weakstrong	sweet	42.97
9	male	19	awfulnice	angular1	19.73
9	male	19	awfulnice	angular2	56.25
9	male	19	awfulnice	bitter	10.74
9	male	19	awfulnice	round1	77.15
9	male	19	awfulnice	round2	71.88
9	male	19	awfulnice	salty	31.45
9	male	19	awfulnice	sour	59.18
9	male	19	awfulnice	sweet	84.96
9	male	19	badgood	angular1	12.5
9	male	19	badgood	angular2	79.49
9	male	19	badgood	bitter	17.19
9	male	19	badgood	round1	75
9	male	19	badgood	round2	84.18
9	male	19	badgood	salty	23.83
9	male	19	badgood	sour	7.42
9	male	19	badgood	sweet	94.73
9	male	19	deadalive	angular1	83.4
9	male	19	deadalive	angular2	97.66
9	male	19	deadalive	bitter	83.2
9	male	19	deadalive	round1	44.34
9	male	19	deadalive	round2	40.62
9	male	19	deadalive	salty	80.08
9	male	19	deadalive	sour	65.62
9	male	19	deadalive	sweet	92.58
9	male	19	harshmild	angular1	11.72
9	male	19	harshmild	angular2	34.18
9	male	19	harshmild	bitter	13.48
9	male	19	harshmild	round1	90.04
9	male	19	harshmild	round2	66.41
9	male	19	harshmild	salty	33.98
9	male	19	harshmild	sour	22.85
9	male	19	harshmild	sweet	81.45
9	male	19	lightheavy	angular1	73.44
9	male	19	lightheavy	angular2	19.14
9	male	19	lightheavy	bitter	88.09
9	male	19	lightheavy	round1	22.66
9	male	19	lightheavy	round2	13.09
9	male	19	lightheavy	salty	77.93
9	male	19	lightheavy	sour	93.16
9	male	19	lightheavy	sweet	12.11
9	male	19	passiveactive	angular1	94.53
9	male	19	passiveactive	angular2	91.8
9	male	19	passiveactive	bitter	58.4
9	male	19	passiveactive	round1	24.41
9	male	19	passiveactive	round2	60.74
9	male	19	passiveactive	salty	75.59
9	male	19	passiveactive	sour	83.2
9	male	19	passiveactive	sweet	13.87
9	male	19	lesspowerful	angular1	85.74
9	male	19	lesspowerful	angular2	89.84
9	male	19	lesspowerful	bitter	70.51
9	male	19	lesspowerful	round1	8.2
9	male	19	lesspowerful	round2	22.85
9	male	19	lesspowerful	salty	59.77
9	male	19	lesspowerful	sour	77.54
9	male	19	lesspowerful	sweet	37.5
9	male	19	quietnoisy	angular1	89.06
9	male	19	quietnoisy	angular2	70.7
9	male	19	quietnoisy	bitter	77.93
9	male	19	quietnoisy	round1	35.35
9	male	19	quietnoisy	round2	83.2
9	male	19	quietnoisy	salty	63.87
9	male	19	quietnoisy	sour	65.82
9	male	19	quietnoisy	sweet	40.04
9	male	19	sadhappy	angular1	38.09
9	male	19	sadhappy	angular2	54.69
9	male	19	sadhappy	bitter	27.34
9	male	19	sadhappy	round1	86.13
9	male	19	sadhappy	round2	76.56
9	male	19	sadhappy	salty	15.43
9	male	19	sadhappy	sour	22.27
9	male	19	sadhappy	sweet	11.52
9	male	19	shallowdeep	angular1	92.58
9	male	19	shallowdeep	angular2	61.52
9	male	19	shallowdeep	bitter	75.39
9	male	19	shallowdeep	round1	23.83
9	male	19	shallowdeep	round2	60.74
9	male	19	shallowdeep	salty	44.73
9	male	19	shallowdeep	sour	39.06
9	male	19	shallowdeep	sweet	32.81
9	male	19	slowfast	angular1	92.77
9	male	19	slowfast	angular2	85.16
9	male	19	slowfast	bitter	69.92
9	male	19	slowfast	round1	18.75
9	male	19	slowfast	round2	12.7
9	male	19	slowfast	salty	31.45
9	male	19	slowfast	sour	25.2
9	male	19	slowfast	sweet	67.58
9	male	19	weakstrong	angular1	91.41
9	male	19	weakstrong	angular2	64.65
9	male	19	weakstrong	bitter	79.88
9	male	19	weakstrong	round1	19.92
9	male	19	weakstrong	round2	16.6
9	male	19	weakstrong	salty	70.7
9	male	19	weakstrong	sour	82.23
9	male	19	weakstrong	sweet	57.42
10	female	23	awfulnice	angular1	30.66
10	female	23	awfulnice	angular2	32.62
10	female	23	awfulnice	bitter	22.85
10	female	23	awfulnice	round1	73.44
10	female	23	awfulnice	round2	61.91
10	female	23	awfulnice	salty	62.11
10	female	23	awfulnice	sour	36.91
10	female	23	awfulnice	sweet	88.09
10	female	23	badgood	angular1	17.77
10	female	23	badgood	angular2	33.98
10	female	23	badgood	bitter	9.38
10	female	23	badgood	round1	33.59
10	female	23	badgood	round2	63.09
10	female	23	badgood	salty	65.23
10	female	23	badgood	sour	32.81
10	female	23	badgood	sweet	90.63
10	female	23	deadalive	angular1	57.62
10	female	23	deadalive	angular2	82.62
10	female	23	deadalive	bitter	21.68
10	female	23	deadalive	round1	41.21
10	female	23	deadalive	round2	64.26
10	female	23	deadalive	salty	40.43
10	female	23	deadalive	sour	27.93
10	female	23	deadalive	sweet	78.32
10	female	23	harshmild	angular1	29.3
10	female	23	harshmild	angular2	37.5
10	female	23	harshmild	bitter	18.55
10	female	23	harshmild	round1	69.14
10	female	23	harshmild	round2	73.44
10	female	23	harshmild	salty	35.94
10	female	23	harshmild	sour	25.2
10	female	23	harshmild	sweet	69.14
10	female	23	lightheavy	angular1	16.6
10	female	23	lightheavy	angular2	33.79
10	female	23	lightheavy	bitter	83.2
10	female	23	lightheavy	round1	73.83
10	female	23	lightheavy	round2	82.62
10	female	23	lightheavy	salty	71.68
10	female	23	lightheavy	sour	38.67
10	female	23	lightheavy	sweet	19.92
10	female	23	passiveactive	angular1	74.61
10	female	23	passiveactive	angular2	77.54
10	female	23	passiveactive	bitter	61.52
10	female	23	passiveactive	round1	12.89
10	female	23	passiveactive	round2	29.69
10	female	23	passiveactive	salty	66.6
10	female	23	passiveactive	sour	17.58
10	female	23	passiveactive	sweet	83.2
10	female	23	lesspowerful	angular1	75.78
10	female	23	lesspowerful	angular2	86.72
10	female	23	lesspowerful	bitter	82.81
10	female	23	lesspowerful	round1	32.42
10	female	23	lesspowerful	round2	46.68
10	female	23	lesspowerful	salty	77.34
10	female	23	lesspowerful	sour	57.42
10	female	23	lesspowerful	sweet	74.02
10	female	23	quietnoisy	angular1	72.85
10	female	23	quietnoisy	angular2	93.95
10	female	23	quietnoisy	bitter	72.27
10	female	23	quietnoisy	round1	19.14
10	female	23	quietnoisy	round2	58.79
10	female	23	quietnoisy	salty	67.58
10	female	23	quietnoisy	sour	76.56
10	female	23	quietnoisy	sweet	29.88
10	female	23	sadhappy	angular1	34.57
10	female	23	sadhappy	angular2	69.73
10	female	23	sadhappy	bitter	25.39
10	female	23	sadhappy	round1	74.02
10	female	23	sadhappy	round2	89.26
10	female	23	sadhappy	salty	39.45
10	female	23	sadhappy	sour	39.26
10	female	23	sadhappy	sweet	92.77
10	female	23	shallowdeep	angular1	34.18
10	female	23	shallowdeep	angular2	55.66
10	female	23	shallowdeep	bitter	9.57
10	female	23	shallowdeep	round1	73.83
10	female	23	shallowdeep	round2	83.59
10	female	23	shallowdeep	salty	12.11
10	female	23	shallowdeep	sour	80.47
10	female	23	shallowdeep	sweet	71.48
10	female	23	slowfast	angular1	71.48
10	female	23	slowfast	angular2	81.64
10	female	23	slowfast	bitter	74.61
10	female	23	slowfast	round1	25.59
10	female	23	slowfast	round2	31.64
10	female	23	slowfast	salty	85.74
10	female	23	slowfast	sour	78.52
10	female	23	slowfast	sweet	22.66
10	female	23	weakstrong	angular1	75.2
10	female	23	weakstrong	angular2	90.63
10	female	23	weakstrong	bitter	92.19
10	female	23	weakstrong	round1	26.76
10	female	23	weakstrong	round2	28.52
10	female	23	weakstrong	salty	77.93
10	female	23	weakstrong	sour	86.33
10	female	23	weakstrong	sweet	64.84
11	female	21	awfulnice	angular1	69.92
11	female	21	awfulnice	angular2	54.69
11	female	21	awfulnice	bitter	34.96
11	female	21	awfulnice	round1	73.63
11	female	21	awfulnice	round2	64.26
11	female	21	awfulnice	salty	51.95
11	female	21	awfulnice	sour	31.05
11	female	21	awfulnice	sweet	87.7
11	female	21	badgood	angular1	63.67
11	female	21	badgood	angular2	27.15
11	female	21	badgood	bitter	6.45
11	female	21	badgood	round1	75
11	female	21	badgood	round2	62.11
11	female	21	badgood	salty	32.81
11	female	21	badgood	sour	15.82
11	female	21	badgood	sweet	91.99
11	female	21	deadalive	angular1	82.42
11	female	21	deadalive	angular2	91.99
11	female	21	deadalive	bitter	65.23
11	female	21	deadalive	round1	13.09
11	female	21	deadalive	round2	28.32
11	female	21	deadalive	salty	74.8
11	female	21	deadalive	sour	42.58
11	female	21	deadalive	sweet	60.55
11	female	21	harshmild	angular1	9.18
11	female	21	harshmild	angular2	4.1
11	female	21	harshmild	bitter	9.96
11	female	21	harshmild	round1	93.75
11	female	21	harshmild	round2	89.26
11	female	21	harshmild	salty	75.39
11	female	21	harshmild	sour	9.77
11	female	21	harshmild	sweet	85.16
11	female	21	lightheavy	angular1	34.57
11	female	21	lightheavy	angular2	62.7
11	female	21	lightheavy	bitter	76.17
11	female	21	lightheavy	round1	16.41
11	female	21	lightheavy	round2	29.88
11	female	21	lightheavy	salty	31.84
11	female	21	lightheavy	sour	62.5
11	female	21	lightheavy	sweet	29.1
11	female	21	passiveactive	angular1	75.59
11	female	21	passiveactive	angular2	90.23
11	female	21	passiveactive	bitter	49.22
11	female	21	passiveactive	round1	3.91
11	female	21	passiveactive	round2	26.76
11	female	21	passiveactive	salty	69.34
11	female	21	passiveactive	sour	68.55
11	female	21	passiveactive	sweet	38.48
11	female	21	lesspowerful	angular1	76.95
11	female	21	lesspowerful	angular2	80.08
11	female	21	lesspowerful	bitter	80.86
11	female	21	lesspowerful	round1	6.25
11	female	21	lesspowerful	round2	26.37
11	female	21	lesspowerful	salty	81.05
11	female	21	lesspowerful	sour	67.38
11	female	21	lesspowerful	sweet	37.7
11	female	21	quietnoisy	angular1	82.03
11	female	21	quietnoisy	angular2	91.6
11	female	21	quietnoisy	bitter	14.45
11	female	21	quietnoisy	round1	25.98
11	female	21	quietnoisy	round2	28.32
11	female	21	quietnoisy	salty	83.2
11	female	21	quietnoisy	sour	27.93
11	female	21	quietnoisy	sweet	30.08
11	female	21	sadhappy	angular1	77.34
11	female	21	sadhappy	angular2	61.33
11	female	21	sadhappy	bitter	18.75
11	female	21	sadhappy	round1	18.55
11	female	21	sadhappy	round2	20.9
11	female	21	sadhappy	salty	31.45
11	female	21	sadhappy	sour	34.77
11	female	21	sadhappy	sweet	92.19
11	female	21	shallowdeep	angular1	36.13
11	female	21	shallowdeep	angular2	66.02
11	female	21	shallowdeep	bitter	28.32
11	female	21	shallowdeep	round1	70.9
11	female	21	shallowdeep	round2	66.8
11	female	21	shallowdeep	salty	50.2
11	female	21	shallowdeep	sour	35.35
11	female	21	shallowdeep	sweet	71.48
11	female	21	slowfast	angular1	91.02
11	female	21	slowfast	angular2	81.45
11	female	21	slowfast	bitter	68.36
11	female	21	slowfast	round1	6.05
11	female	21	slowfast	round2	20.9
11	female	21	slowfast	salty	67.19
11	female	21	slowfast	sour	75.59
11	female	21	slowfast	sweet	34.96
11	female	21	weakstrong	angular1	85.74
11	female	21	weakstrong	angular2	80.86
11	female	21	weakstrong	bitter	60.74
11	female	21	weakstrong	round1	1.56
11	female	21	weakstrong	round2	4.88
11	female	21	weakstrong	salty	73.05
11	female	21	weakstrong	sour	89.06
11	female	21	weakstrong	sweet	42.97
12	male	19	awfulnice	angular1	37.5
12	male	19	awfulnice	angular2	41.41
12	male	19	awfulnice	bitter	40.62
12	male	19	awfulnice	round1	35.74
12	male	19	awfulnice	round2	42.38
12	male	19	awfulnice	salty	60.35
12	male	19	awfulnice	sour	57.42
12	male	19	awfulnice	sweet	59.96
12	male	19	badgood	angular1	50
12	male	19	badgood	angular2	49.61
12	male	19	badgood	bitter	50.2
12	male	19	badgood	round1	50.59
12	male	19	badgood	round2	48.63
12	male	19	badgood	salty	48.83
12	male	19	badgood	sour	51.76
12	male	19	badgood	sweet	51.76
12	male	19	deadalive	angular1	66.41
12	male	19	deadalive	angular2	63.48
12	male	19	deadalive	bitter	28.13
12	male	19	deadalive	round1	26.76
12	male	19	deadalive	round2	55.86
12	male	19	deadalive	salty	30.08
12	male	19	deadalive	sour	65.23
12	male	19	deadalive	sweet	60.55
12	male	19	harshmild	angular1	17.97
12	male	19	harshmild	angular2	16.6
12	male	19	harshmild	bitter	5.66
12	male	19	harshmild	round1	92.38
12	male	19	harshmild	round2	53.32
12	male	19	harshmild	salty	36.91
12	male	19	harshmild	sour	22.46
12	male	19	harshmild	sweet	33.59
12	male	19	lightheavy	angular1	33.79
12	male	19	lightheavy	angular2	30.27
12	male	19	lightheavy	bitter	93.55
12	male	19	lightheavy	round1	66.8
12	male	19	lightheavy	round2	50.98
12	male	19	lightheavy	salty	29.3
12	male	19	lightheavy	sour	31.05
12	male	19	lightheavy	sweet	23.44
12	male	19	passiveactive	angular1	74.61
12	male	19	passiveactive	angular2	92.77
12	male	19	passiveactive	bitter	19.53
12	male	19	passiveactive	round1	4.3
12	male	19	passiveactive	round2	61.52
12	male	19	passiveactive	salty	65.04
12	male	19	passiveactive	sour	70.31
12	male	19	passiveactive	sweet	60.55
12	male	19	lesspowerful	angular1	66.21
12	male	19	lesspowerful	angular2	72.27
12	male	19	lesspowerful	bitter	56.45
12	male	19	lesspowerful	round1	30.47
12	male	19	lesspowerful	round2	42.38
12	male	19	lesspowerful	salty	51.37
12	male	19	lesspowerful	sour	50
12	male	19	lesspowerful	sweet	50.78
12	male	19	quietnoisy	angular1	72.46
12	male	19	quietnoisy	angular2	97.85
12	male	19	quietnoisy	bitter	12.89
12	male	19	quietnoisy	round1	16.99
12	male	19	quietnoisy	round2	47.46
12	male	19	quietnoisy	salty	83.2
12	male	19	quietnoisy	sour	95.12
12	male	19	quietnoisy	sweet	88.09
12	male	19	sadhappy	angular1	52.73
12	male	19	sadhappy	angular2	50.39
12	male	19	sadhappy	bitter	28.52
12	male	19	sadhappy	round1	32.42
12	male	19	sadhappy	round2	51.56
12	male	19	sadhappy	salty	59.57
12	male	19	sadhappy	sour	57.62
12	male	19	sadhappy	sweet	62.11
12	male	19	shallowdeep	angular1	26.17
12	male	19	shallowdeep	angular2	30.08
12	male	19	shallowdeep	bitter	81.84
12	male	19	shallowdeep	round1	68.55
12	male	19	shallowdeep	round2	47.66
12	male	19	shallowdeep	salty	50.78
12	male	19	shallowdeep	sour	48.83
12	male	19	shallowdeep	sweet	39.06
12	male	19	slowfast	angular1	78.32
12	male	19	slowfast	angular2	74.61
12	male	19	slowfast	bitter	5.47
12	male	19	slowfast	round1	24.8
12	male	19	slowfast	round2	24.22
12	male	19	slowfast	salty	72.07
12	male	19	slowfast	sour	70.51
12	male	19	slowfast	sweet	69.73
12	male	19	weakstrong	angular1	50.59
12	male	19	weakstrong	angular2	65.43
12	male	19	weakstrong	bitter	55.47
12	male	19	weakstrong	round1	35.94
12	male	19	weakstrong	round2	40.63
12	male	19	weakstrong	salty	57.03
12	male	19	weakstrong	sour	31.84
12	male	19	weakstrong	sweet	41.21
13	male	22	awfulnice	angular1	19.34
13	male	22	awfulnice	angular2	30.66
13	male	22	awfulnice	bitter	12.11
13	male	22	awfulnice	round1	5.08
13	male	22	awfulnice	round2	1.37
13	male	22	awfulnice	salty	3.13
13	male	22	awfulnice	sour	24.02
13	male	22	awfulnice	sweet	75.78
13	male	22	badgood	angular1	34.77
13	male	22	badgood	angular2	6.45
13	male	22	badgood	bitter	5.86
13	male	22	badgood	round1	92.38
13	male	22	badgood	round2	17.97
13	male	22	badgood	salty	12.5
13	male	22	badgood	sour	23.83
13	male	22	badgood	sweet	94.14
13	male	22	deadalive	angular1	74.02
13	male	22	deadalive	angular2	89.84
13	male	22	deadalive	bitter	12.3
13	male	22	deadalive	round1	22.46
13	male	22	deadalive	round2	68.95
13	male	22	deadalive	salty	82.03
13	male	22	deadalive	sour	11.72
13	male	22	deadalive	sweet	80.47
13	male	22	harshmild	angular1	4.88
13	male	22	harshmild	angular2	3.13
13	male	22	harshmild	bitter	84.38
13	male	22	harshmild	round1	88.48
13	male	22	harshmild	round2	90.04
13	male	22	harshmild	salty	8.59
13	male	22	harshmild	sour	83.01
13	male	22	harshmild	sweet	77.73
13	male	22	lightheavy	angular1	73.05
13	male	22	lightheavy	angular2	88.48
13	male	22	lightheavy	bitter	74.8
13	male	22	lightheavy	round1	10.55
13	male	22	lightheavy	round2	2.15
13	male	22	lightheavy	salty	93.36
13	male	22	lightheavy	sour	86.13
13	male	22	lightheavy	sweet	75.2
13	male	22	passiveactive	angular1	91.02
13	male	22	passiveactive	angular2	89.65
13	male	22	passiveactive	bitter	9.38
13	male	22	passiveactive	round1	9.38
13	male	22	passiveactive	round2	11.72
13	male	22	passiveactive	salty	85.74
13	male	22	passiveactive	sour	83.4
13	male	22	passiveactive	sweet	82.03
13	male	22	lesspowerful	angular1	87.5
13	male	22	lesspowerful	angular2	86.33
13	male	22	lesspowerful	bitter	68.16
13	male	22	lesspowerful	round1	19.14
13	male	22	lesspowerful	round2	22.07
13	male	22	lesspowerful	salty	14.06
13	male	22	lesspowerful	sour	71.88
13	male	22	lesspowerful	sweet	45.51
13	male	22	quietnoisy	angular1	16.02
13	male	22	quietnoisy	angular2	94.14
13	male	22	quietnoisy	bitter	32.42
13	male	22	quietnoisy	round1	22.66
13	male	22	quietnoisy	round2	94.53
13	male	22	quietnoisy	salty	59.57
13	male	22	quietnoisy	sour	89.65
13	male	22	quietnoisy	sweet	11.72
13	male	22	sadhappy	angular1	4.49
13	male	22	sadhappy	angular2	11.52
13	male	22	sadhappy	bitter	8.2
13	male	22	sadhappy	round1	89.45
13	male	22	sadhappy	round2	90.43
13	male	22	sadhappy	salty	5.47
13	male	22	sadhappy	sour	15.23
13	male	22	sadhappy	sweet	94.14
13	male	22	shallowdeep	angular1	83.2
13	male	22	shallowdeep	angular2	14.84
13	male	22	shallowdeep	bitter	16.21
13	male	22	shallowdeep	round1	7.81
13	male	22	shallowdeep	round2	88.87
13	male	22	shallowdeep	salty	84.37
13	male	22	shallowdeep	sour	90.04
13	male	22	shallowdeep	sweet	84.37
13	male	22	slowfast	angular1	81.64
13	male	22	slowfast	angular2	93.75
13	male	22	slowfast	bitter	80.86
13	male	22	slowfast	round1	9.96
13	male	22	slowfast	round2	8.01
13	male	22	slowfast	salty	80.86
13	male	22	slowfast	sour	9.57
13	male	22	slowfast	sweet	82.23
13	male	22	weakstrong	angular1	96.48
13	male	22	weakstrong	angular2	93.95
13	male	22	weakstrong	bitter	13.09
13	male	22	weakstrong	round1	13.28
13	male	22	weakstrong	round2	12.5
13	male	22	weakstrong	salty	93.95
13	male	22	weakstrong	sour	94.34
13	male	22	weakstrong	sweet	19.34
14	female	28	awfulnice	angular1	67.57
14	female	28	awfulnice	angular2	87.08
14	female	28	awfulnice	bitter	64.78
14	female	28	awfulnice	round1	8.51
14	female	28	awfulnice	round2	7.49
14	female	28	awfulnice	salty	74.66
14	female	28	awfulnice	sour	33.09
14	female	28	awfulnice	sweet	32.83
14	female	28	badgood	angular1	47.29
14	female	28	badgood	angular2	76.94
14	female	28	badgood	bitter	33.59
14	female	28	badgood	round1	14.59
14	female	28	badgood	round2	66.3
14	female	28	badgood	salty	78.97
14	female	28	badgood	sour	69.84
14	female	28	badgood	sweet	77.71
14	female	28	deadalive	angular1	92.66
14	female	28	deadalive	angular2	85.56
14	female	28	deadalive	bitter	41.46
14	female	28	deadalive	round1	68.57
14	female	28	deadalive	round2	90.89
14	female	28	deadalive	salty	24.22
14	female	28	deadalive	sour	37.91
14	female	28	deadalive	sweet	21.43
14	female	28	harshmild	angular1	16.61
14	female	28	harshmild	angular2	35.62
14	female	28	harshmild	bitter	12.3
14	female	28	harshmild	round1	87.08
14	female	28	harshmild	round2	91.89
14	female	28	harshmild	salty	64.01
14	female	28	harshmild	sour	66.04
14	female	28	harshmild	sweet	36.13
14	female	28	lightheavy	angular1	81.61
14	female	28	lightheavy	angular2	39.53
14	female	28	lightheavy	bitter	59.81
14	female	28	lightheavy	round1	5.82
14	female	28	lightheavy	round2	10.89
14	female	28	lightheavy	salty	43.59
14	female	28	lightheavy	sour	38.27
14	female	28	lightheavy	sweet	75.78
14	female	28	passiveactive	angular1	92.91
14	female	28	passiveactive	angular2	71.62
14	female	28	passiveactive	bitter	36.89
14	female	28	passiveactive	round1	60.47
14	female	28	passiveactive	round2	19.91
14	female	28	passiveactive	salty	31.06
14	female	28	passiveactive	sour	78.47
14	female	28	passiveactive	sweet	26.75
14	female	28	lesspowerful	angular1	93.42
14	female	28	lesspowerful	angular2	94.18
14	female	28	lesspowerful	bitter	39.93
14	female	28	lesspowerful	round1	9.51
14	female	28	lesspowerful	round2	16.61
14	female	28	lesspowerful	salty	70.35
14	female	28	lesspowerful	sour	50.83
14	female	28	lesspowerful	sweet	45.25
14	female	28	quietnoisy	angular1	89.62
14	female	28	quietnoisy	angular2	96.72
14	female	28	quietnoisy	bitter	81.5
14	female	28	quietnoisy	round1	7.24
14	female	28	quietnoisy	round2	12.05
14	female	28	quietnoisy	salty	28.27
14	female	28	quietnoisy	sour	62.24
14	female	28	quietnoisy	sweet	51.59
14	female	28	sadhappy	angular1	79.83
14	female	28	sadhappy	angular2	84.91
14	female	28	sadhappy	bitter	69.95
14	female	28	sadhappy	round1	3.54
14	female	28	sadhappy	round2	19
14	female	28	sadhappy	salty	28.89
14	female	28	sadhappy	sour	61.59
14	female	28	sadhappy	sweet	61.08
14	female	28	shallowdeep	angular1	94.18
14	female	28	shallowdeep	angular2	50.07
14	female	28	shallowdeep	bitter	36.39
14	female	28	shallowdeep	round1	6.22
14	female	28	shallowdeep	round2	11.29
14	female	28	shallowdeep	salty	66.3
14	female	28	shallowdeep	sour	37.15
14	female	28	shallowdeep	sweet	70.86
14	female	28	slowfast	angular1	88.46
14	female	28	slowfast	angular2	84.4
14	female	28	slowfast	bitter	69.95
14	female	28	slowfast	round1	3.03
14	female	28	slowfast	round2	6.07
14	female	28	slowfast	salty	21.03
14	female	28	slowfast	sour	47.65
14	female	28	slowfast	sweet	36.49
14	female	28	weakstrong	angular1	96.72
14	female	28	weakstrong	angular2	92.66
14	female	28	weakstrong	bitter	35.37
14	female	28	weakstrong	round1	5.46
14	female	28	weakstrong	round2	6.22
14	female	28	weakstrong	salty	44.49
14	female	28	weakstrong	sour	17.63
14	female	28	weakstrong	sweet	49.32
15	male	26	awfulnice	angular1	50.87
15	male	26	awfulnice	angular2	38.44
15	male	26	awfulnice	bitter	30.63
15	male	26	awfulnice	round1	69.06
15	male	26	awfulnice	round2	49.25
15	male	26	awfulnice	salty	40.05
15	male	26	awfulnice	sour	39.03
15	male	26	awfulnice	sweet	86.68
15	male	26	badgood	angular1	42.34
15	male	26	badgood	angular2	40.74
15	male	26	badgood	bitter	26.53
15	male	26	badgood	round1	61.95
15	male	26	badgood	round2	50.35
15	male	26	badgood	salty	37.74
15	male	26	badgood	sour	67.97
15	male	26	badgood	sweet	79.79
15	male	26	deadalive	angular1	64.07
15	male	26	deadalive	angular2	67.67
15	male	26	deadalive	bitter	27.03
15	male	26	deadalive	round1	62.86
15	male	26	deadalive	round2	38.45
15	male	26	deadalive	salty	59.85
15	male	26	deadalive	sour	62.66
15	male	26	deadalive	sweet	71.06
15	male	26	harshmild	angular1	21.42
15	male	26	harshmild	angular2	27.23
15	male	26	harshmild	bitter	72.06
15	male	26	harshmild	round1	66.06
15	male	26	harshmild	round2	51.26
15	male	26	harshmild	salty	25.62
15	male	26	harshmild	sour	23.41
15	male	26	harshmild	sweet	33.03
15	male	26	lightheavy	angular1	67.17
15	male	26	lightheavy	angular2	59.96
15	male	26	lightheavy	bitter	39.54
15	male	26	lightheavy	round1	25.33
15	male	26	lightheavy	round2	53.96
15	male	26	lightheavy	salty	82.38
15	male	26	lightheavy	sour	74.58
15	male	26	lightheavy	sweet	74.38
15	male	26	passiveactive	angular1	88.39
15	male	26	passiveactive	angular2	85.79
15	male	26	passiveactive	bitter	29.33
15	male	26	passiveactive	round1	24.13
15	male	26	passiveactive	round2	65.57
15	male	26	passiveactive	salty	61.76
15	male	26	passiveactive	sour	88.59
15	male	26	passiveactive	sweet	66.57
15	male	26	lesspowerful	angular1	76.47
15	male	26	lesspowerful	angular2	77.07
15	male	26	lesspowerful	bitter	34.23
15	male	26	lesspowerful	round1	40.44
15	male	26	lesspowerful	round2	59.25
15	male	26	lesspowerful	salty	46.65
15	male	26	lesspowerful	sour	85.48
15	male	26	lesspowerful	sweet	77.47
15	male	26	quietnoisy	angular1	88.39
15	male	26	quietnoisy	angular2	87.39
15	male	26	quietnoisy	bitter	28.73
15	male	26	quietnoisy	round1	21.13
15	male	26	quietnoisy	round2	52.75
15	male	26	quietnoisy	salty	66.57
15	male	26	quietnoisy	sour	94.2
15	male	26	quietnoisy	sweet	87.78
15	male	26	sadhappy	angular1	57.65
15	male	26	sadhappy	angular2	64.26
15	male	26	sadhappy	bitter	29.23
15	male	26	sadhappy	round1	60.86
15	male	26	sadhappy	round2	40.84
15	male	26	sadhappy	salty	35.63
15	male	26	sadhappy	sour	51.05
15	male	26	sadhappy	sweet	81.07
15	male	26	shallowdeep	angular1	63.46
15	male	26	shallowdeep	angular2	54.85
15	male	26	shallowdeep	bitter	36.24
15	male	26	shallowdeep	round1	38.63
15	male	26	shallowdeep	round2	63.26
15	male	26	shallowdeep	salty	53.65
15	male	26	shallowdeep	sour	61.05
15	male	26	shallowdeep	sweet	71.67
15	male	26	slowfast	angular1	91.4
15	male	26	slowfast	angular2	94.99
15	male	26	slowfast	bitter	28.73
15	male	26	slowfast	round1	21.13
15	male	26	slowfast	round2	52.15
15	male	26	slowfast	salty	28.94
15	male	26	slowfast	sour	78.38
15	male	26	slowfast	sweet	81.39
15	male	26	weakstrong	angular1	78.98
15	male	26	weakstrong	angular2	80.19
15	male	26	weakstrong	bitter	36.34
15	male	26	weakstrong	round1	38.54
15	male	26	weakstrong	round2	51.56
15	male	26	weakstrong	salty	75.98
15	male	26	weakstrong	sour	75.58
15	male	26	weakstrong	sweet	75.78
16	female	37	awfulnice	angular1	14.84
16	female	37	awfulnice	angular2	41.41
16	female	37	awfulnice	bitter	6.64
16	female	37	awfulnice	round1	56.64
16	female	37	awfulnice	round2	69.53
16	female	37	awfulnice	salty	66.02
16	female	37	awfulnice	sour	43.95
16	female	37	awfulnice	sweet	89.45
16	female	37	badgood	angular1	4.49
16	female	37	badgood	angular2	20.7
16	female	37	badgood	bitter	18.75
16	female	37	badgood	round1	68.95
16	female	37	badgood	round2	60.55
16	female	37	badgood	salty	60.94
16	female	37	badgood	sour	15.63
16	female	37	badgood	sweet	91.8
16	female	37	deadalive	angular1	75.39
16	female	37	deadalive	angular2	97.27
16	female	37	deadalive	bitter	77.15
16	female	37	deadalive	round1	40.43
16	female	37	deadalive	round2	55.27
16	female	37	deadalive	salty	96.48
16	female	37	deadalive	sour	61.91
16	female	37	deadalive	sweet	45.12
16	female	37	harshmild	angular1	8.98
16	female	37	harshmild	angular2	11.33
16	female	37	harshmild	bitter	1.37
16	female	37	harshmild	round1	82.03
16	female	37	harshmild	round2	61.13
16	female	37	harshmild	salty	21.88
16	female	37	harshmild	sour	22.46
16	female	37	harshmild	sweet	94.73
16	female	37	lightheavy	angular1	98.83
16	female	37	lightheavy	angular2	92.19
16	female	37	lightheavy	bitter	88.87
16	female	37	lightheavy	round1	13.87
16	female	37	lightheavy	round2	29.69
16	female	37	lightheavy	salty	80.27
16	female	37	lightheavy	sour	69.14
16	female	37	lightheavy	sweet	27.93
16	female	37	passiveactive	angular1	98.83
16	female	37	passiveactive	angular2	98.83
16	female	37	passiveactive	bitter	84.77
16	female	37	passiveactive	round1	4.88
16	female	37	passiveactive	round2	72.46
16	female	37	passiveactive	salty	75
16	female	37	passiveactive	sour	93.75
16	female	37	passiveactive	sweet	20.31
16	female	37	lesspowerful	angular1	90.23
16	female	37	lesspowerful	angular2	93.36
16	female	37	lesspowerful	bitter	91.6
16	female	37	lesspowerful	round1	7.42
16	female	37	lesspowerful	round2	24.22
16	female	37	lesspowerful	salty	77.34
16	female	37	lesspowerful	sour	94.73
16	female	37	lesspowerful	sweet	17.19
16	female	37	quietnoisy	angular1	96.29
16	female	37	quietnoisy	angular2	83.4
16	female	37	quietnoisy	bitter	91.8
16	female	37	quietnoisy	round1	22.27
16	female	37	quietnoisy	round2	57.03
16	female	37	quietnoisy	salty	88.09
16	female	37	quietnoisy	sour	83.4
16	female	37	quietnoisy	sweet	15.62
16	female	37	sadhappy	angular1	10.16
16	female	37	sadhappy	angular2	65.82
16	female	37	sadhappy	bitter	27.73
16	female	37	sadhappy	round1	77.34
16	female	37	sadhappy	round2	71.09
16	female	37	sadhappy	salty	62.5
16	female	37	sadhappy	sour	36.91
16	female	37	sadhappy	sweet	75.2
16	female	37	shallowdeep	angular1	84.18
16	female	37	shallowdeep	angular2	80.08
16	female	37	shallowdeep	bitter	78.91
16	female	37	shallowdeep	round1	31.25
16	female	37	shallowdeep	round2	49.22
16	female	37	shallowdeep	salty	72.27
16	female	37	shallowdeep	sour	70.7
16	female	37	shallowdeep	sweet	28.71
16	female	37	slowfast	angular1	84.18
16	female	37	slowfast	angular2	76.37
16	female	37	slowfast	bitter	75.39
16	female	37	slowfast	round1	13.67
16	female	37	slowfast	round2	24.22
16	female	37	slowfast	salty	61.72
16	female	37	slowfast	sour	61.13
16	female	37	slowfast	sweet	19.92
16	female	37	weakstrong	angular1	87.11
16	female	37	weakstrong	angular2	94.92
16	female	37	weakstrong	bitter	86.52
16	female	37	weakstrong	round1	12.5
16	female	37	weakstrong	round2	48.44
16	female	37	weakstrong	salty	59.38
16	female	37	weakstrong	sour	65.04
16	female	37	weakstrong	sweet	17.77
17	male	29	awfulnice	angular1	45.12
17	male	29	awfulnice	angular2	40.04
17	male	29	awfulnice	bitter	12.89
17	male	29	awfulnice	round1	50.98
17	male	29	awfulnice	round2	48.05
17	male	29	awfulnice	salty	49.02
17	male	29	awfulnice	sour	56.84
17	male	29	awfulnice	sweet	92.77
17	male	29	badgood	angular1	48.44
17	male	29	badgood	angular2	49.41
17	male	29	badgood	bitter	7.03
17	male	29	badgood	round1	63.28
17	male	29	badgood	round2	74.61
17	male	29	badgood	salty	67.77
17	male	29	badgood	sour	15.04
17	male	29	badgood	sweet	90.62
17	male	29	deadalive	angular1	82.62
17	male	29	deadalive	angular2	66.21
17	male	29	deadalive	bitter	47.85
17	male	29	deadalive	round1	35.74
17	male	29	deadalive	round2	38.48
17	male	29	deadalive	salty	50.39
17	male	29	deadalive	sour	48.63
17	male	29	deadalive	sweet	50.78
17	male	29	harshmild	angular1	6.45
17	male	29	harshmild	angular2	19.73
17	male	29	harshmild	bitter	12.11
17	male	29	harshmild	round1	76.17
17	male	29	harshmild	round2	52.93
17	male	29	harshmild	salty	49.8
17	male	29	harshmild	sour	36.13
17	male	29	harshmild	sweet	84.18
17	male	29	lightheavy	angular1	93.16
17	male	29	lightheavy	angular2	72.07
17	male	29	lightheavy	bitter	64.45
17	male	29	lightheavy	round1	5.08
17	male	29	lightheavy	round2	26.56
17	male	29	lightheavy	salty	49.61
17	male	29	lightheavy	sour	59.18
17	male	29	lightheavy	sweet	30.86
17	male	29	passiveactive	angular1	100
17	male	29	passiveactive	angular2	84.77
17	male	29	passiveactive	bitter	50.98
17	male	29	passiveactive	round1	30.08
17	male	29	passiveactive	round2	35.74
17	male	29	passiveactive	salty	50.59
17	male	29	passiveactive	sour	50.2
17	male	29	passiveactive	sweet	52.73
17	male	29	lesspowerful	angular1	64.45
17	male	29	lesspowerful	angular2	65.04
17	male	29	lesspowerful	bitter	51.76
17	male	29	lesspowerful	round1	39.26
17	male	29	lesspowerful	round2	37.89
17	male	29	lesspowerful	salty	51.37
17	male	29	lesspowerful	sour	49.02
17	male	29	lesspowerful	sweet	50.39
17	male	29	quietnoisy	angular1	100
17	male	29	quietnoisy	angular2	100
17	male	29	quietnoisy	bitter	48.44
17	male	29	quietnoisy	round1	0
17	male	29	quietnoisy	round2	1.17
17	male	29	quietnoisy	salty	48.83
17	male	29	quietnoisy	sour	50.39
17	male	29	quietnoisy	sweet	49.8
17	male	29	sadhappy	angular1	5.66
17	male	29	sadhappy	angular2	22.85
17	male	29	sadhappy	bitter	0
17	male	29	sadhappy	round1	66.99
17	male	29	sadhappy	round2	75.78
17	male	29	sadhappy	salty	52.93
17	male	29	sadhappy	sour	36.52
17	male	29	sadhappy	sweet	89.84
17	male	29	shallowdeep	angular1	48.24
17	male	29	shallowdeep	angular2	48.05
17	male	29	shallowdeep	bitter	48.44
17	male	29	shallowdeep	round1	49.02
17	male	29	shallowdeep	round2	47.66
17	male	29	shallowdeep	salty	48.63
17	male	29	shallowdeep	sour	48.05
17	male	29	shallowdeep	sweet	46.68
17	male	29	slowfast	angular1	100
17	male	29	slowfast	angular2	79.69
17	male	29	slowfast	bitter	50.98
17	male	29	slowfast	round1	16.41
17	male	29	slowfast	round2	37.3
17	male	29	slowfast	salty	49.41
17	male	29	slowfast	sour	50.39
17	male	29	slowfast	sweet	48.83
17	male	29	weakstrong	angular1	73.63
17	male	29	weakstrong	angular2	70.31
17	male	29	weakstrong	bitter	65.23
17	male	29	weakstrong	round1	39.65
17	male	29	weakstrong	round2	37.89
17	male	29	weakstrong	salty	51.56
17	male	29	weakstrong	sour	51.37
17	male	29	weakstrong	sweet	38.87
18	male	28	awfulnice	angular1	21.09
18	male	28	awfulnice	angular2	45.7
18	male	28	awfulnice	bitter	22.85
18	male	28	awfulnice	round1	47.66
18	male	28	awfulnice	round2	74.02
18	male	28	awfulnice	salty	100
18	male	28	awfulnice	sour	0
18	male	28	awfulnice	sweet	72.07
18	male	28	badgood	angular1	18.16
18	male	28	badgood	angular2	40.43
18	male	28	badgood	bitter	25.39
18	male	28	badgood	round1	58.79
18	male	28	badgood	round2	63.67
18	male	28	badgood	salty	100
18	male	28	badgood	sour	15.23
18	male	28	badgood	sweet	69.73
18	male	28	deadalive	angular1	100
18	male	28	deadalive	angular2	80.47
18	male	28	deadalive	bitter	50.98
18	male	28	deadalive	round1	37.5
18	male	28	deadalive	round2	57.23
18	male	28	deadalive	salty	62.89
18	male	28	deadalive	sour	50.78
18	male	28	deadalive	sweet	70.9
18	male	28	harshmild	angular1	0
18	male	28	harshmild	angular2	12.5
18	male	28	harshmild	bitter	54.1
18	male	28	harshmild	round1	85.94
18	male	28	harshmild	round2	45.12
18	male	28	harshmild	salty	44.53
18	male	28	harshmild	sour	33.98
18	male	28	harshmild	sweet	63.48
18	male	28	lightheavy	angular1	69.34
18	male	28	lightheavy	angular2	48.63
18	male	28	lightheavy	bitter	61.72
18	male	28	lightheavy	round1	38.28
18	male	28	lightheavy	round2	54.3
18	male	28	lightheavy	salty	64.06
18	male	28	lightheavy	sour	63.09
18	male	28	lightheavy	sweet	41.6
18	male	28	passiveactive	angular1	100
18	male	28	passiveactive	angular2	89.84
18	male	28	passiveactive	bitter	30.86
18	male	28	passiveactive	round1	17.38
18	male	28	passiveactive	round2	64.26
18	male	28	passiveactive	salty	67.38
18	male	28	passiveactive	sour	47.66
18	male	28	passiveactive	sweet	50
18	male	28	lesspowerful	angular1	40.43
18	male	28	lesspowerful	angular2	80.86
18	male	28	lesspowerful	bitter	63.28
18	male	28	lesspowerful	round1	47.07
18	male	28	lesspowerful	round2	51.76
18	male	28	lesspowerful	salty	61.13
18	male	28	lesspowerful	sour	72.46
18	male	28	lesspowerful	sweet	26.76
18	male	28	quietnoisy	angular1	98.83
18	male	28	quietnoisy	angular2	75
18	male	28	quietnoisy	bitter	53.32
18	male	28	quietnoisy	round1	30.47
18	male	28	quietnoisy	round2	70.12
18	male	28	quietnoisy	salty	48.63
18	male	28	quietnoisy	sour	51.17
18	male	28	quietnoisy	sweet	50.98
18	male	28	sadhappy	angular1	18.36
18	male	28	sadhappy	angular2	59.77
18	male	28	sadhappy	bitter	17.97
18	male	28	sadhappy	round1	51.37
18	male	28	sadhappy	round2	65.23
18	male	28	sadhappy	salty	46.29
18	male	28	sadhappy	sour	20.12
18	male	28	sadhappy	sweet	100
18	male	28	shallowdeep	angular1	82.23
18	male	28	shallowdeep	angular2	58.59
18	male	28	shallowdeep	bitter	60.94
18	male	28	shallowdeep	round1	32.62
18	male	28	shallowdeep	round2	70.7
18	male	28	shallowdeep	salty	64.06
18	male	28	shallowdeep	sour	40.23
18	male	28	shallowdeep	sweet	37.11
18	male	28	slowfast	angular1	79.1
18	male	28	slowfast	angular2	73.05
18	male	28	slowfast	bitter	53.71
18	male	28	slowfast	round1	26.37
18	male	28	slowfast	round2	30.66
18	male	28	slowfast	salty	60.35
18	male	28	slowfast	sour	35.55
18	male	28	slowfast	sweet	68.95
18	male	28	weakstrong	angular1	100
18	male	28	weakstrong	angular2	86.91
18	male	28	weakstrong	bitter	51.17
18	male	28	weakstrong	round1	30.27
18	male	28	weakstrong	round2	61.91
18	male	28	weakstrong	salty	62.11
18	male	28	weakstrong	sour	57.81
18	male	28	weakstrong	sweet	35.35
19	male	38	awfulnice	angular1	50.98
19	male	38	awfulnice	angular2	11.13
19	male	38	awfulnice	bitter	37.3
19	male	38	awfulnice	round1	52.34
19	male	38	awfulnice	round2	65.23
19	male	38	awfulnice	salty	65.04
19	male	38	awfulnice	sour	60.74
19	male	38	awfulnice	sweet	95.51
19	male	38	badgood	angular1	35.16
19	male	38	badgood	angular2	5.86
19	male	38	badgood	bitter	35.16
19	male	38	badgood	round1	49.41
19	male	38	badgood	round2	54.1
19	male	38	badgood	salty	79.69
19	male	38	badgood	sour	63.09
19	male	38	badgood	sweet	94.92
19	male	38	deadalive	angular1	33.2
19	male	38	deadalive	angular2	4.49
19	male	38	deadalive	bitter	51.37
19	male	38	deadalive	round1	57.23
19	male	38	deadalive	round2	49.02
19	male	38	deadalive	salty	50.39
19	male	38	deadalive	sour	49.41
19	male	38	deadalive	sweet	50
19	male	38	harshmild	angular1	20.31
19	male	38	harshmild	angular2	12.89
19	male	38	harshmild	bitter	9.38
19	male	38	harshmild	round1	82.03
19	male	38	harshmild	round2	81.84
19	male	38	harshmild	salty	30.66
19	male	38	harshmild	sour	39.84
19	male	38	harshmild	sweet	90.23
19	male	38	lightheavy	angular1	78.13
19	male	38	lightheavy	angular2	79.49
19	male	38	lightheavy	bitter	38.28
19	male	38	lightheavy	round1	22.07
19	male	38	lightheavy	round2	21.48
19	male	38	lightheavy	salty	72.85
19	male	38	lightheavy	sour	72.07
19	male	38	lightheavy	sweet	33.2
19	male	38	passiveactive	angular1	72.85
19	male	38	passiveactive	angular2	92.97
19	male	38	passiveactive	bitter	71.09
19	male	38	passiveactive	round1	11.91
19	male	38	passiveactive	round2	13.09
19	male	38	passiveactive	salty	60.55
19	male	38	passiveactive	sour	66.8
19	male	38	passiveactive	sweet	22.66
19	male	38	lesspowerful	angular1	37.11
19	male	38	lesspowerful	angular2	81.45
19	male	38	lesspowerful	bitter	36.91
19	male	38	lesspowerful	round1	6.45
19	male	38	lesspowerful	round2	16.99
19	male	38	lesspowerful	salty	66.6
19	male	38	lesspowerful	sour	66.21
19	male	38	lesspowerful	sweet	30.66
19	male	38	quietnoisy	angular1	80.47
19	male	38	quietnoisy	angular2	100
19	male	38	quietnoisy	bitter	80.86
19	male	38	quietnoisy	round1	21.48
19	male	38	quietnoisy	round2	35.94
19	male	38	quietnoisy	salty	51.95
19	male	38	quietnoisy	sour	49.41
19	male	38	quietnoisy	sweet	50.39
19	male	38	sadhappy	angular1	49.41
19	male	38	sadhappy	angular2	20.31
19	male	38	sadhappy	bitter	17.58
19	male	38	sadhappy	round1	33.59
19	male	38	sadhappy	round2	69.73
19	male	38	sadhappy	salty	59.57
19	male	38	sadhappy	sour	64.26
19	male	38	sadhappy	sweet	86.33
19	male	38	shallowdeep	angular1	69.34
19	male	38	shallowdeep	angular2	73.24
19	male	38	shallowdeep	bitter	39.65
19	male	38	shallowdeep	round1	24.41
19	male	38	shallowdeep	round2	14.84
19	male	38	shallowdeep	salty	57.81
19	male	38	shallowdeep	sour	55.86
19	male	38	shallowdeep	sweet	33.01
19	male	38	slowfast	angular1	79.49
19	male	38	slowfast	angular2	95.9
19	male	38	slowfast	bitter	58.79
19	male	38	slowfast	round1	20.31
19	male	38	slowfast	round2	18.16
19	male	38	slowfast	salty	52.34
19	male	38	slowfast	sour	51.95
19	male	38	slowfast	sweet	48.83
19	male	38	weakstrong	angular1	77.73
19	male	38	weakstrong	angular2	94.34
19	male	38	weakstrong	bitter	33.2
19	male	38	weakstrong	round1	12.7
19	male	38	weakstrong	round2	16.21
19	male	38	weakstrong	salty	81.64
19	male	38	weakstrong	sour	87.89
19	male	38	weakstrong	sweet	28.32
20	female	32	awfulnice	angular1	40.39
20	female	32	awfulnice	angular2	51.23
20	female	32	awfulnice	bitter	16.99
20	female	32	awfulnice	round1	40.39
20	female	32	awfulnice	round2	50.98
20	female	32	awfulnice	salty	61.82
20	female	32	awfulnice	sour	60.83
20	female	32	awfulnice	sweet	74.38
20	female	32	badgood	angular1	53.46
20	female	32	badgood	angular2	52.22
20	female	32	badgood	bitter	30.06
20	female	32	badgood	round1	49.02
20	female	32	badgood	round2	53.46
20	female	32	badgood	salty	80.55
20	female	32	badgood	sour	80.3
20	female	32	badgood	sweet	88.93
20	female	32	deadalive	angular1	65.77
20	female	32	deadalive	angular2	62.81
20	female	32	deadalive	bitter	62.81
20	female	32	deadalive	round1	45.82
20	female	32	deadalive	round2	59.85
20	female	32	deadalive	salty	75.37
20	female	32	deadalive	sour	75.37
20	female	32	deadalive	sweet	72.42
20	female	32	harshmild	angular1	20.44
20	female	32	harshmild	angular2	32.27
20	female	32	harshmild	bitter	19.7
20	female	32	harshmild	round1	62.56
20	female	32	harshmild	round2	56.89
20	female	32	harshmild	salty	52.46
20	female	32	harshmild	sour	63.05
20	female	32	harshmild	sweet	74.63
20	female	32	lightheavy	angular1	79.8
20	female	32	lightheavy	angular2	52.22
20	female	32	lightheavy	bitter	72.17
20	female	32	lightheavy	round1	29.8
20	female	32	lightheavy	round2	51.73
20	female	32	lightheavy	salty	41.39
20	female	32	lightheavy	sour	48.04
20	female	32	lightheavy	sweet	46.06
20	female	32	passiveactive	angular1	51.24
20	female	32	passiveactive	angular2	63.8
20	female	32	passiveactive	bitter	61.83
20	female	32	passiveactive	round1	27.1
20	female	32	passiveactive	round2	51.24
20	female	32	passiveactive	salty	68.97
20	female	32	passiveactive	sour	79.07
20	female	32	passiveactive	sweet	45.82
20	female	32	lesspowerful	angular1	58.62
20	female	32	lesspowerful	angular2	72.67
20	female	32	lesspowerful	bitter	82.52
20	female	32	lesspowerful	round1	20.94
20	female	32	lesspowerful	round2	58.13
20	female	32	lesspowerful	salty	68.97
20	female	32	lesspowerful	sour	86.46
20	female	32	lesspowerful	sweet	75.37
20	female	32	quietnoisy	angular1	72.91
20	female	32	quietnoisy	angular2	86.71
20	female	32	quietnoisy	bitter	82.28
20	female	32	quietnoisy	round1	18.97
20	female	32	quietnoisy	round2	50.25
20	female	32	quietnoisy	salty	76.86
20	female	32	quietnoisy	sour	76.86
20	female	32	quietnoisy	sweet	50.7
20	female	32	sadhappy	angular1	64.79
20	female	32	sadhappy	angular2	62.07
20	female	32	sadhappy	bitter	17.99
20	female	32	sadhappy	round1	30.06
20	female	32	sadhappy	round2	41.63
20	female	32	sadhappy	salty	77.34
20	female	32	sadhappy	sour	72.17
20	female	32	sadhappy	sweet	77.34
20	female	32	shallowdeep	angular1	58.37
20	female	32	shallowdeep	angular2	47.78
20	female	32	shallowdeep	bitter	47.53
20	female	32	shallowdeep	round1	28.32
20	female	32	shallowdeep	round2	49.26
20	female	32	shallowdeep	salty	52.46
20	female	32	shallowdeep	sour	52.46
20	female	32	shallowdeep	sweet	52.46
20	female	32	slowfast	angular1	65.51
20	female	32	slowfast	angular2	56.4
20	female	32	slowfast	bitter	48.52
20	female	32	slowfast	round1	14.03
20	female	32	slowfast	round2	34.97
20	female	32	slowfast	salty	66.01
20	female	32	slowfast	sour	66.01
20	female	32	slowfast	sweet	59.11
20	female	32	weakstrong	angular1	68.47
20	female	32	weakstrong	angular2	50.73
20	female	32	weakstrong	bitter	64.78
20	female	32	weakstrong	round1	27.09
20	female	32	weakstrong	round2	32.75
20	female	32	weakstrong	salty	52.21
20	female	32	weakstrong	sour	72.16
20	female	32	weakstrong	sweet	60.59
21	male	29	awfulnice	angular1	5.27
21	male	29	awfulnice	angular2	38.28
21	male	29	awfulnice	bitter	20.31
21	male	29	awfulnice	round1	53.71
21	male	29	awfulnice	round2	37.3
21	male	29	awfulnice	salty	56.05
21	male	29	awfulnice	sour	62.7
21	male	29	awfulnice	sweet	94.92
21	male	29	badgood	angular1	24.02
21	male	29	badgood	angular2	6.64
21	male	29	badgood	bitter	35.74
21	male	29	badgood	round1	59.18
21	male	29	badgood	round2	55.86
21	male	29	badgood	salty	50
21	male	29	badgood	sour	57.03
21	male	29	badgood	sweet	100
21	male	29	deadalive	angular1	81.05
21	male	29	deadalive	angular2	29.49
21	male	29	deadalive	bitter	7.23
21	male	29	deadalive	round1	27.15
21	male	29	deadalive	round2	30.08
21	male	29	deadalive	salty	39.45
21	male	29	deadalive	sour	46.09
21	male	29	deadalive	sweet	95.51
21	male	29	harshmild	angular1	0
21	male	29	harshmild	angular2	0
21	male	29	harshmild	bitter	0
21	male	29	harshmild	round1	79.3
21	male	29	harshmild	round2	65.43
21	male	29	harshmild	salty	13.28
21	male	29	harshmild	sour	3.71
21	male	29	harshmild	sweet	51.56
21	male	29	lightheavy	angular1	56.25
21	male	29	lightheavy	angular2	81.05
21	male	29	lightheavy	bitter	95.7
21	male	29	lightheavy	round1	10.94
21	male	29	lightheavy	round2	16.41
21	male	29	lightheavy	salty	85.16
21	male	29	lightheavy	sour	55.27
21	male	29	lightheavy	sweet	0
21	male	29	passiveactive	angular1	100
21	male	29	passiveactive	angular2	100
21	male	29	passiveactive	bitter	79.88
21	male	29	passiveactive	round1	34.57
21	male	29	passiveactive	round2	65.23
21	male	29	passiveactive	salty	69.92
21	male	29	passiveactive	sour	22.46
21	male	29	passiveactive	sweet	85.35
21	male	29	lesspowerful	angular1	100
21	male	29	lesspowerful	angular2	100
21	male	29	lesspowerful	bitter	100
21	male	29	lesspowerful	round1	26.56
21	male	29	lesspowerful	round2	25.2
21	male	29	lesspowerful	salty	92.38
21	male	29	lesspowerful	sour	78.71
21	male	29	lesspowerful	sweet	91.02
21	male	29	quietnoisy	angular1	100
21	male	29	quietnoisy	angular2	100
21	male	29	quietnoisy	bitter	8.98
21	male	29	quietnoisy	round1	18.16
21	male	29	quietnoisy	round2	38.48
21	male	29	quietnoisy	salty	71.29
21	male	29	quietnoisy	sour	56.25
21	male	29	quietnoisy	sweet	80.08
21	male	29	sadhappy	angular1	50.2
21	male	29	sadhappy	angular2	30.66
21	male	29	sadhappy	bitter	7.03
21	male	29	sadhappy	round1	29.3
21	male	29	sadhappy	round2	70.9
21	male	29	sadhappy	salty	41.99
21	male	29	sadhappy	sour	23.24
21	male	29	sadhappy	sweet	100
21	male	29	shallowdeep	angular1	0
21	male	29	shallowdeep	angular2	0
21	male	29	shallowdeep	bitter	91.02
21	male	29	shallowdeep	round1	50.98
21	male	29	shallowdeep	round2	25.78
21	male	29	shallowdeep	salty	12.89
21	male	29	shallowdeep	sour	60.35
[truncated: 7,793 more rows]
